# Supplementary material for: Foraging in the tropics: relationships among species’ abundances, niche asymmetries and body condition in an urban avian assemblage
Source: Springer Nature journal article supplement (doi:10.1007/s11252-017-0682-1), 2017-05-23
Supplement: MOESM1 [file 12308632]

## Sheet: Abundances
SPECIES' ABUNDANCES
Tukey multiple comparisons of means
95% family-wise confidence level
Species differences
	diff	lwr	upr	p adj
FlowerpeckerSpp-CommonTailorbird	-0.820238	-3.58875	1.94828	0.974864
JapaneseWhite-eye-CommonTailorbird	2.83056	0.470363	5.19075	0.0079424
OrientalMagpieRobin-CommonTailorbird	-1.79643	-4.32787	0.735009	0.348797
Priniaspp-CommonTailorbird	0.465476	-2.30304	3.23399	0.998826
Red-whiskeredBulbul-CommonTailorbird	3.05761	0.836539	5.27868	0.0011553
TreeSparrow-CommonTailorbird	0.487121	-1.92888	2.90312	0.996746
JapaneseWhite-eye-FlowerpeckerSpp	3.65079	0.829824	6.47176	0.0029226
OrientalMagpieRobin-FlowerpeckerSpp	-0.97619	-3.94192	1.98954	0.957777
Priniaspp-FlowerpeckerSpp	1.28571	-1.88478	4.45621	0.890594
Red-whiskeredBulbul-FlowerpeckerSpp	3.87785	1.1722	6.58349	0.0005929
TreeSparrow-FlowerpeckerSpp	1.30736	-1.56046	4.17518	0.823461
OrientalMagpieRobin-JapaneseWhite-eye	-4.62698	-7.21568	-2.03829	5.5e-06
Priniaspp-JapaneseWhite-eye	-2.36508	-5.18605	0.45589	0.165946
Red-whiskeredBulbul-JapaneseWhite-eye	0.227053	-2.05906	2.51317	0.999945
TreeSparrow-JapaneseWhite-eye	-2.34343	-4.81936	0.132494	0.0767265
Priniaspp-OrientalMagpieRobin	2.2619	-0.703822	5.22763	0.263137
Red-whiskeredBulbul-OrientalMagpieRobin	4.85404	2.39152	7.31656	4e-07
TreeSparrow-OrientalMagpieRobin	2.28355	-0.356127	4.92323	0.138826
Red-whiskeredBulbul-Priniaspp	2.59213	-0.113512	5.29778	0.0701237
TreeSparrow-Priniaspp	0.021645	-2.84618	2.88947	1
TreeSparrow-Red-whiskeredBulbul	-2.57049	-4.91417	-0.226801	0.021434
Habitat differences
	diff	lwr	upr	p adj
Park-CropFields	-0.707101	-2.03715	0.622949	0.422279
Street-CropFields	-0.878472	-2.33663	0.579692	0.331296
Street-Park	-0.171371	-1.46905	1.12631	0.94784
Species*Habitat differences
	diff	lwr	upr	p adj
FlowerpeckerSpp:CropFields-CommonTailorbird:CropFields	-1.6	-8.24261	5.04261	0.999999
JapaneseWhite-eye:CropFields-CommonTailorbird:CropFields	-1.5	-8.70492	5.70492	1
OrientalMagpieRobin:CropFields-CommonTailorbird:CropFields	-2	-7.69599	3.69599	0.999561
Priniaspp:CropFields-CommonTailorbird:CropFields	1.90909	-3.30006	7.11824	0.999196
Red-whiskeredBulbul:CropFields-CommonTailorbird:CropFields	3.5	-1.84331	8.84331	0.706354
TreeSparrow:CropFields-CommonTailorbird:CropFields	2.5	-2.84331	7.84331	0.982826
CommonTailorbird:Park-CommonTailorbird:CropFields	-0.882353	-5.58751	3.8228	1
FlowerpeckerSpp:Park-CommonTailorbird:CropFields	-0.363636	-5.57279	4.84551	1
JapaneseWhite-eye:Park-CommonTailorbird:CropFields	2	-2.47845	6.47845	0.989853
OrientalMagpieRobin:Park-CommonTailorbird:CropFields	-2	-6.99571	2.99571	0.997356
Priniaspp:Park-CommonTailorbird:CropFields	-1.33333	-9.38868	6.72201	1
Red-whiskeredBulbul:Park-CommonTailorbird:CropFields	3.63636	-0.842082	8.11481	0.294635
TreeSparrow:Park-CommonTailorbird:CropFields	-1	-6.09465	4.09465	1
CommonTailorbird:Street-CommonTailorbird:CropFields	0.363636	-4.84551	5.57279	1
FlowerpeckerSpp:Street-CommonTailorbird:CropFields	-2.2	-8.84261	4.44261	0.999814
JapaneseWhite-eye:Street-CommonTailorbird:CropFields	5.4	0.0566876	10.7433	0.0443419
OrientalMagpieRobin:Street-CommonTailorbird:CropFields	-2.28571	-8.2208	3.64937	0.998415
Priniaspp:Street-CommonTailorbird:CropFields	-1.85714	-7.79223	4.07794	0.999921
Red-whiskeredBulbul:Street-CommonTailorbird:CropFields	0.928571	-3.98075	5.8379	1
TreeSparrow:Street-CommonTailorbird:CropFields	-0.545454	-5.7546	4.66369	1
JapaneseWhite-eye:CropFields-FlowerpeckerSpp:CropFields	0.1	-8.27136	8.47136	1
OrientalMagpieRobin:CropFields-FlowerpeckerSpp:CropFields	-0.4	-7.51429	6.71429	1
Priniaspp:CropFields-FlowerpeckerSpp:CropFields	3.50909	-3.22174	10.2399	0.948182
Red-whiskeredBulbul:CropFields-FlowerpeckerSpp:CropFields	5.1	-1.73519	11.9352	0.457438
TreeSparrow:CropFields-FlowerpeckerSpp:CropFields	4.1	-2.73519	10.9352	0.833837
CommonTailorbird:Park-FlowerpeckerSpp:CropFields	0.717647	-5.63115	7.06645	1
FlowerpeckerSpp:Park-FlowerpeckerSpp:CropFields	1.23636	-5.49446	7.96719	1
JapaneseWhite-eye:Park-FlowerpeckerSpp:CropFields	3.6	-2.58266	9.78266	0.86675
OrientalMagpieRobin:Park-FlowerpeckerSpp:CropFields	-0.4	-6.96704	6.16704	1
Priniaspp:Park-FlowerpeckerSpp:CropFields	0.266667	-8.84692	9.38025	1
Red-whiskeredBulbul:Park-FlowerpeckerSpp:CropFields	5.23636	-0.946297	11.419	0.223886
TreeSparrow:Park-FlowerpeckerSpp:CropFields	0.6	-6.04261	7.24261	1
CommonTailorbird:Street-FlowerpeckerSpp:CropFields	1.96364	-4.76719	8.69446	0.999974
FlowerpeckerSpp:Street-FlowerpeckerSpp:CropFields	-0.6	-8.4926	7.2926	1
JapaneseWhite-eye:Street-FlowerpeckerSpp:CropFields	7	0.164812	13.8352	0.0379519
OrientalMagpieRobin:Street-FlowerpeckerSpp:CropFields	-0.685714	-7.99284	6.62141	1
Priniaspp:Street-FlowerpeckerSpp:CropFields	-0.257143	-7.56427	7.04998	1
Red-whiskeredBulbul:Street-FlowerpeckerSpp:CropFields	2.52857	-3.97299	9.03013	0.998193
TreeSparrow:Street-FlowerpeckerSpp:CropFields	1.05455	-5.67628	7.78537	1
OrientalMagpieRobin:CropFields-JapaneseWhite-eye:CropFields	-0.5	-8.14197	7.14197	1
Priniaspp:CropFields-JapaneseWhite-eye:CropFields	3.40909	-3.87724	10.6954	0.982826
Red-whiskeredBulbul:CropFields-JapaneseWhite-eye:CropFields	5	-2.38285	12.3828	0.64743
TreeSparrow:CropFields-JapaneseWhite-eye:CropFields	4	-3.38285	11.3828	0.926428
CommonTailorbird:Park-JapaneseWhite-eye:CropFields	0.617647	-6.31733	7.55262	1
FlowerpeckerSpp:Park-JapaneseWhite-eye:CropFields	1.13636	-6.14997	8.4227	1
JapaneseWhite-eye:Park-JapaneseWhite-eye:CropFields	3.5	-3.28321	10.2832	0.953024
OrientalMagpieRobin:Park-JapaneseWhite-eye:CropFields	-0.5	-7.63531	6.63531	1
Priniaspp:Park-JapaneseWhite-eye:CropFields	0.166667	-9.36455	9.69788	1
Red-whiskeredBulbul:Park-JapaneseWhite-eye:CropFields	5.13636	-1.64685	11.9196	0.427894
TreeSparrow:Park-JapaneseWhite-eye:CropFields	0.5	-6.70492	7.70492	1
CommonTailorbird:Street-JapaneseWhite-eye:CropFields	1.86364	-5.4227	9.14997	0.999997
FlowerpeckerSpp:Street-JapaneseWhite-eye:CropFields	-0.7	-9.07136	7.67136	1
JapaneseWhite-eye:Street-JapaneseWhite-eye:CropFields	6.9	-0.482847	14.2828	0.100302
OrientalMagpieRobin:Street-JapaneseWhite-eye:CropFields	-0.785714	-8.60752	7.03609	1
Priniaspp:Street-JapaneseWhite-eye:CropFields	-0.357143	-8.17895	7.46467	1
Red-whiskeredBulbul:Street-JapaneseWhite-eye:CropFields	2.42857	-4.64652	9.50366	0.999684
TreeSparrow:Street-JapaneseWhite-eye:CropFields	0.954546	-6.33179	8.24088	1
Priniaspp:CropFields-OrientalMagpieRobin:CropFields	3.90909	-1.88954	9.70772	0.655833
Red-whiskeredBulbul:CropFields-OrientalMagpieRobin:CropFields	5.5	-0.419447	11.4194	0.105921
TreeSparrow:CropFields-OrientalMagpieRobin:CropFields	4.5	-1.41945	10.4194	0.42004
CommonTailorbird:Park-OrientalMagpieRobin:CropFields	1.11765	-4.2328	6.4681	1
FlowerpeckerSpp:Park-OrientalMagpieRobin:CropFields	1.63636	-4.16227	7.43499	0.999985
JapaneseWhite-eye:Park-OrientalMagpieRobin:CropFields	4	-1.15222	9.15222	0.378598
OrientalMagpieRobin:Park-OrientalMagpieRobin:CropFields	-2.66453e-15	-5.60767	5.60767	1
Priniaspp:Park-OrientalMagpieRobin:CropFields	0.666667	-7.78185	9.11519	1
Red-whiskeredBulbul:Park-OrientalMagpieRobin:CropFields	5.63636	0.484147	10.7886	0.0161882
TreeSparrow:Park-OrientalMagpieRobin:CropFields	1	-4.69599	6.69599	1
CommonTailorbird:Street-OrientalMagpieRobin:CropFields	2.36364	-3.43499	8.16227	0.996667
FlowerpeckerSpp:Street-OrientalMagpieRobin:CropFields	-0.2	-7.31429	6.91429	1
JapaneseWhite-eye:Street-OrientalMagpieRobin:CropFields	7.4	1.48055	13.3194	0.0018698
OrientalMagpieRobin:Street-OrientalMagpieRobin:CropFields	-0.285714	-6.74436	6.17293	1
Priniaspp:Street-OrientalMagpieRobin:CropFields	0.142857	-6.31579	6.6015	1
Red-whiskeredBulbul:Street-OrientalMagpieRobin:CropFields	2.92857	-2.60228	8.45943	0.940151
TreeSparrow:Street-OrientalMagpieRobin:CropFields	1.45454	-4.34408	7.25317	0.999998
Red-whiskeredBulbul:CropFields-Priniaspp:CropFields	1.59091	-3.86168	7.0435	0.999974
TreeSparrow:CropFields-Priniaspp:CropFields	0.590909	-4.86168	6.0435	1
CommonTailorbird:Park-Priniaspp:CropFields	-2.79144	-7.62034	2.03745	0.874004
FlowerpeckerSpp:Park-Priniaspp:CropFields	-2.27273	-7.59391	3.04846	0.994031
JapaneseWhite-eye:Park-Priniaspp:CropFields	0.0909091	-4.51737	4.69919	1
OrientalMagpieRobin:Park-Priniaspp:CropFields	-3.90909	-9.02152	1.20334	0.408532
Priniaspp:Park-Priniaspp:CropFields	-3.24242	-11.3707	4.88582	0.997477
Red-whiskeredBulbul:Park-Priniaspp:CropFields	1.72727	-2.88101	6.33556	0.998902
TreeSparrow:Park-Priniaspp:CropFields	-2.90909	-8.11824	2.30006	0.904608
CommonTailorbird:Street-Priniaspp:CropFields	-1.54546	-6.86664	3.77573	0.999976
FlowerpeckerSpp:Street-Priniaspp:CropFields	-4.10909	-10.8399	2.62174	0.811905
JapaneseWhite-eye:Street-Priniaspp:CropFields	3.49091	-1.96168	8.9435	0.743605
OrientalMagpieRobin:Street-Priniaspp:CropFields	-4.1948	-10.2285	1.83885	0.598024
Priniaspp:Street-Priniaspp:CropFields	-3.76623	-9.79989	2.26742	0.78162
Red-whiskeredBulbul:Street-Priniaspp:CropFields	-0.980519	-6.00857	4.04753	1
TreeSparrow:Street-Priniaspp:CropFields	-2.45454	-7.77573	2.86664	0.985325
TreeSparrow:CropFields-Red-whiskeredBulbul:CropFields	-1	-6.58091	4.58091	1
CommonTailorbird:Park-Red-whiskeredBulbul:CropFields	-4.38235	-9.35568	0.590977	0.166744
FlowerpeckerSpp:Park-Red-whiskeredBulbul:CropFields	-3.86364	-9.31623	1.58896	0.560895
JapaneseWhite-eye:Park-Red-whiskeredBulbul:CropFields	-1.5	-6.25941	3.25941	0.999912
OrientalMagpieRobin:Park-Red-whiskeredBulbul:CropFields	-5.5	-10.7491	-0.250933	0.0286742
Priniaspp:Park-Red-whiskeredBulbul:CropFields	-4.83333	-13.0482	3.38154	0.855809
Red-whiskeredBulbul:Park-Red-whiskeredBulbul:CropFields	0.136364	-4.62305	4.89578	1
TreeSparrow:Park-Red-whiskeredBulbul:CropFields	-4.5	-9.84331	0.843312	0.232803
CommonTailorbird:Street-Red-whiskeredBulbul:CropFields	-3.13636	-8.58896	2.31623	0.878808
FlowerpeckerSpp:Street-Red-whiskeredBulbul:CropFields	-5.7	-12.5352	1.13519	0.248786
JapaneseWhite-eye:Street-Red-whiskeredBulbul:CropFields	1.9	-3.68091	7.48091	0.99972
OrientalMagpieRobin:Street-Red-whiskeredBulbul:CropFields	-5.78571	-11.9356	0.364147	0.0942249
Priniaspp:Street-Red-whiskeredBulbul:CropFields	-5.35714	-11.507	0.792718	0.182318
Red-whiskeredBulbul:Street-Red-whiskeredBulbul:CropFields	-2.57143	-7.73835	2.59549	0.967068
TreeSparrow:Street-Red-whiskeredBulbul:CropFields	-4.04545	-9.49805	1.40714	0.468815
CommonTailorbird:Park-TreeSparrow:CropFields	-3.38235	-8.35568	1.59098	0.639671
FlowerpeckerSpp:Park-TreeSparrow:CropFields	-2.86364	-8.31623	2.58896	0.9445
JapaneseWhite-eye:Park-TreeSparrow:CropFields	-0.5	-5.25941	4.25941	1
OrientalMagpieRobin:Park-TreeSparrow:CropFields	-4.5	-9.74907	0.749067	0.205339
Priniaspp:Park-TreeSparrow:CropFields	-3.83333	-12.0482	4.38154	0.98332
Red-whiskeredBulbul:Park-TreeSparrow:CropFields	1.13636	-3.62305	5.89578	0.999999
TreeSparrow:Park-TreeSparrow:CropFields	-3.5	-8.84331	1.84331	0.706354
CommonTailorbird:Street-TreeSparrow:CropFields	-2.13636	-7.58896	3.31623	0.998006
FlowerpeckerSpp:Street-TreeSparrow:CropFields	-4.7	-11.5352	2.13519	0.619066
JapaneseWhite-eye:Street-TreeSparrow:CropFields	2.9	-2.68091	8.48091	0.949769
OrientalMagpieRobin:Street-TreeSparrow:CropFields	-4.78571	-10.9356	1.36415	0.374053
Priniaspp:Street-TreeSparrow:CropFields	-4.35714	-10.507	1.79272	0.561152
Red-whiskeredBulbul:Street-TreeSparrow:CropFields	-1.57143	-6.73835	3.59549	0.999949
TreeSparrow:Street-TreeSparrow:CropFields	-3.04546	-8.49805	2.40714	0.904501
FlowerpeckerSpp:Park-CommonTailorbird:Park	0.518717	-4.31018	5.34761	1
JapaneseWhite-eye:Park-CommonTailorbird:Park	2.88235	-1.14747	6.91218	0.542329
OrientalMagpieRobin:Park-CommonTailorbird:Park	-1.11765	-5.71549	3.4802	0.999999
Priniaspp:Park-CommonTailorbird:Park	-0.45098	-8.26581	7.36385	1
Red-whiskeredBulbul:Park-CommonTailorbird:Park	4.51872	0.48889	8.54854	0.0113634
TreeSparrow:Park-CommonTailorbird:Park	-0.117647	-4.8228	4.58751	1
CommonTailorbird:Street-CommonTailorbird:Park	1.24599	-3.58291	6.07489	0.999996
FlowerpeckerSpp:Street-CommonTailorbird:Park	-1.31765	-7.66645	5.03115	1
JapaneseWhite-eye:Street-CommonTailorbird:Park	6.28235	1.30902	11.2557	0.0015381
OrientalMagpieRobin:Street-CommonTailorbird:Park	-1.40336	-7.00767	4.20095	0.999998
Priniaspp:Street-CommonTailorbird:Park	-0.97479	-6.5791	4.62952	1
Red-whiskeredBulbul:Street-CommonTailorbird:Park	1.81092	-2.69291	6.31476	0.997203
TreeSparrow:Street-CommonTailorbird:Park	0.336898	-4.492	5.1658	1
JapaneseWhite-eye:Park-FlowerpeckerSpp:Park	2.36364	-2.24465	6.97192	0.955641
OrientalMagpieRobin:Park-FlowerpeckerSpp:Park	-1.63636	-6.74879	3.47607	0.999889
Priniaspp:Park-FlowerpeckerSpp:Park	-0.969697	-9.09794	7.15855	1
Red-whiskeredBulbul:Park-FlowerpeckerSpp:Park	4	-0.608283	8.60828	0.187314
TreeSparrow:Park-FlowerpeckerSpp:Park	-0.636364	-5.84551	4.57279	1
CommonTailorbird:Street-FlowerpeckerSpp:Park	0.727273	-4.59391	6.04846	1
FlowerpeckerSpp:Street-FlowerpeckerSpp:Park	-1.83636	-8.56719	4.89446	0.999991
JapaneseWhite-eye:Street-FlowerpeckerSpp:Park	5.76364	0.311042	11.2162	0.0256418
OrientalMagpieRobin:Street-FlowerpeckerSpp:Park	-1.92208	-7.95574	4.11158	0.999896
Priniaspp:Street-FlowerpeckerSpp:Park	-1.49351	-7.52717	4.54015	0.999998
Red-whiskeredBulbul:Street-FlowerpeckerSpp:Park	1.29221	-3.73584	6.32026	0.999997
TreeSparrow:Street-FlowerpeckerSpp:Park	-0.181818	-5.503	5.13937	1
OrientalMagpieRobin:Park-JapaneseWhite-eye:Park	-4	-8.36557	0.365569	0.120186
Priniaspp:Park-JapaneseWhite-eye:Park	-3.33333	-11.0138	4.34714	0.992757
Red-whiskeredBulbul:Park-JapaneseWhite-eye:Park	1.63636	-2.12628	5.39901	0.992576
TreeSparrow:Park-JapaneseWhite-eye:Park	-3	-7.47845	1.47845	0.667297
CommonTailorbird:Street-JapaneseWhite-eye:Park	-1.63636	-6.24465	2.97192	0.999485
FlowerpeckerSpp:Street-JapaneseWhite-eye:Park	-4.2	-10.3827	1.98266	0.641793
JapaneseWhite-eye:Street-JapaneseWhite-eye:Park	3.4	-1.35941	8.15941	0.544781
OrientalMagpieRobin:Street-JapaneseWhite-eye:Park	-4.28571	-9.70109	1.12966	0.341804
Priniaspp:Street-JapaneseWhite-eye:Park	-3.85714	-9.27252	1.55823	0.550671
Red-whiskeredBulbul:Street-JapaneseWhite-eye:Park	-1.07143	-5.33787	3.19501	0.999998
TreeSparrow:Street-JapaneseWhite-eye:Park	-2.54546	-7.15374	2.06283	0.913027
Priniaspp:Park-OrientalMagpieRobin:Park	0.666667	-7.32648	8.65981	1
Red-whiskeredBulbul:Park-OrientalMagpieRobin:Park	5.63636	1.27079	10.0019	0.0010079
TreeSparrow:Park-OrientalMagpieRobin:Park	1	-3.99571	5.99571	1
CommonTailorbird:Street-OrientalMagpieRobin:Park	2.36364	-2.74879	7.47607	0.984947
FlowerpeckerSpp:Street-OrientalMagpieRobin:Park	-0.2	-6.76704	6.36704	1
JapaneseWhite-eye:Street-OrientalMagpieRobin:Park	7.4	2.15093	12.6491	0.0001514
OrientalMagpieRobin:Street-OrientalMagpieRobin:Park	-0.285714	-6.1361	5.56467	1
Priniaspp:Street-OrientalMagpieRobin:Park	0.142857	-5.70752	5.99324	1
Red-whiskeredBulbul:Street-OrientalMagpieRobin:Park	2.92857	-1.87801	7.73515	0.814456
TreeSparrow:Street-OrientalMagpieRobin:Park	1.45454	-3.65789	6.56698	0.999982
Red-whiskeredBulbul:Park-Priniaspp:Park	4.9697	-2.71077	12.6502	0.726648
TreeSparrow:Park-Priniaspp:Park	0.333333	-7.72201	8.38868	1
CommonTailorbird:Street-Priniaspp:Park	1.69697	-6.43128	9.82522	1
FlowerpeckerSpp:Street-Priniaspp:Park	-0.866667	-9.98025	8.24692	1
JapaneseWhite-eye:Street-Priniaspp:Park	6.73333	-1.48154	14.9482	0.278046
OrientalMagpieRobin:Street-Priniaspp:Park	-0.952381	-9.56391	7.65915	1
Priniaspp:Street-Priniaspp:Park	-0.52381	-9.13534	8.08772	1
Red-whiskeredBulbul:Street-Priniaspp:Park	2.26191	-5.67753	10.2013	0.999982
TreeSparrow:Street-Priniaspp:Park	0.787879	-7.34037	8.91613	1
TreeSparrow:Park-Red-whiskeredBulbul:Park	-4.63636	-9.11481	-0.157918	0.0332997
CommonTailorbird:Street-Red-whiskeredBulbul:Park	-3.27273	-7.88101	1.33556	0.556448
FlowerpeckerSpp:Street-Red-whiskeredBulbul:Park	-5.83636	-12.019	0.346297	0.0912015
JapaneseWhite-eye:Street-Red-whiskeredBulbul:Park	1.76364	-2.99578	6.52305	0.999062
OrientalMagpieRobin:Street-Red-whiskeredBulbul:Park	-5.92208	-11.3375	-0.506704	0.016271
Priniaspp:Street-Red-whiskeredBulbul:Park	-5.49351	-10.9089	-0.0781321	0.0424461
Red-whiskeredBulbul:Street-Red-whiskeredBulbul:Park	-2.70779	-6.97423	1.55865	0.757084
TreeSparrow:Street-Red-whiskeredBulbul:Park	-4.18182	-8.7901	0.426465	0.13078
CommonTailorbird:Street-TreeSparrow:Park	1.36364	-3.84551	6.57279	0.999996
FlowerpeckerSpp:Street-TreeSparrow:Park	-1.2	-7.84261	5.44261	1
JapaneseWhite-eye:Street-TreeSparrow:Park	6.4	1.05669	11.7433	0.0039972
OrientalMagpieRobin:Street-TreeSparrow:Park	-1.28571	-7.2208	4.64937	1
Priniaspp:Street-TreeSparrow:Park	-0.857143	-6.79223	5.07794	1
Red-whiskeredBulbul:Street-TreeSparrow:Park	1.92857	-2.98075	6.8379	0.997936
TreeSparrow:Street-TreeSparrow:Park	0.454545	-4.7546	5.66369	1
FlowerpeckerSpp:Street-CommonTailorbird:Street	-2.56364	-9.29446	4.16719	0.998634
JapaneseWhite-eye:Street-CommonTailorbird:Street	5.03636	-0.41623	10.489	0.111812
OrientalMagpieRobin:Street-CommonTailorbird:Street	-2.64935	-8.68301	3.38431	0.991677
Priniaspp:Street-CommonTailorbird:Street	-2.22078	-8.25444	3.81288	0.999146
Red-whiskeredBulbul:Street-CommonTailorbird:Street	0.564935	-4.46311	5.59298	1
TreeSparrow:Street-CommonTailorbird:Street	-0.909091	-6.23028	4.4121	1
JapaneseWhite-eye:Street-FlowerpeckerSpp:Street	7.6	0.764812	14.4352	0.0128531
OrientalMagpieRobin:Street-FlowerpeckerSpp:Street	-0.0857143	-7.39284	7.22141	1
Priniaspp:Street-FlowerpeckerSpp:Street	0.342857	-6.96427	7.64998	1
Red-whiskeredBulbul:Street-FlowerpeckerSpp:Street	3.12857	-3.37299	9.63013	0.976749
TreeSparrow:Street-FlowerpeckerSpp:Street	1.65454	-5.07628	8.38537	0.999998
OrientalMagpieRobin:Street-JapaneseWhite-eye:Street	-7.68571	-13.8356	-1.53585	0.0018803
Priniaspp:Street-JapaneseWhite-eye:Street	-7.25714	-13.407	-1.10728	0.0051277
Red-whiskeredBulbul:Street-JapaneseWhite-eye:Street	-4.47143	-9.63835	0.695488	0.191594
TreeSparrow:Street-JapaneseWhite-eye:Street	-5.94545	-11.398	-0.492861	0.0169415
Priniaspp:Street-OrientalMagpieRobin:Street	0.428571	-6.24189	7.09903	1
Red-whiskeredBulbul:Street-OrientalMagpieRobin:Street	3.21429	-2.5625	8.99107	0.907489
TreeSparrow:Street-OrientalMagpieRobin:Street	1.74026	-4.2934	7.77392	0.999978
Red-whiskeredBulbul:Street-Priniaspp:Street	2.78571	-2.99107	8.5625	0.976221
TreeSparrow:Street-Priniaspp:Street	1.31169	-4.72197	7.34535	1
TreeSparrow:Street-Red-whiskeredBulbul:Street	-1.47403	-6.50207	3.55402	0.999972
