# Supplementary material for: Foraging in the tropics: relationships among species’ abundances, niche asymmetries and body condition in an urban avian assemblage
Source: Springer Nature journal article supplement (doi:10.1007/s11252-017-0682-1), 2017-05-23
Supplement: MOESM2 [file 12308632]

## Sheet: D1 differences
SPECIES' DIFFERENCES IN PCA COMPONENT D1
Tukey multiple comparisons of means
95% family-wise confidence level
Species' differences
	diff	lwr	upr	p adj
Flowerpecker-Bulbul	-0.0088909	-0.0145813	-0.00320047	9.22e-05
Prinia-Bulbul	-0.0221711	-0.0278256	-0.0165165	0
Robin-Bulbul	-0.0230086	-0.0301035	-0.0159138	0
Sparrow-Bulbul	-0.022837	-0.0280253	-0.0176487	0
Tailorbird-Bulbul	-0.0152185	-0.0194907	-0.0109463	0
White-eye-Bulbul	0.000794194	-0.00297738	0.00456577	0.996093
Prinia-Flowerpecker	-0.0132802	-0.0202397	-0.00632072	5e-07
Robin-Flowerpecker	-0.0141177	-0.0222907	-0.00594476	8.6e-06
Sparrow-Flowerpecker	-0.0139461	-0.0205323	-0.00735982	0
Tailorbird-Flowerpecker	-0.00632758	-0.0122193	-0.00043587	0.0260213
White-eye-Flowerpecker	0.00968509	0.00414568	0.0152245	6.3e-06
Robin-Prinia	-0.000837549	-0.0089856	0.0073105	0.999936
Sparrow-Prinia	-0.000665877	-0.00722117	0.00588941	0.999941
Tailorbird-Prinia	0.00695262	0.00109555	0.0128097	0.0085977
White-eye-Prinia	0.0229653	0.0174627	0.0284678	0
Sparrow-Robin	0.000171672	-0.00766001	0.00800335	1
Tailorbird-Robin	0.00779017	0.000532854	0.0150475	0.0261553
White-eye-Robin	0.0238028	0.0168285	0.0307772	0
Tailorbird-Sparrow	0.0076185	0.0022102	0.0130268	0.0006876
White-eye-Sparrow	0.0236312	0.018609	0.0286534	0
White-eye-Tailorbird	0.0160127	0.0119438	0.0200816	0
Habitat differences
	diff	lwr	upr	p adj
Park-Crop Fields	-0.000559883	-0.00325055	0.00213079	0.876732
Street-Crop Fields	0.000763296	-0.0021991	0.0037257	0.817391
Street-Park	0.00132318	-0.00123518	0.00388154	0.444893
Habitat*Species differences
	diff	lwr	upr	p adj
Flowerpecker:Crop Fields-Bulbul:Crop Fields	-0.00994091	-0.025445	0.00556318	0.758926
Prinia:Crop Fields-Bulbul:Crop Fields	-0.0239803	-0.033902	-0.0140586	0
Robin:Crop Fields-Bulbul:Crop Fields	-0.0279136	-0.045591	-0.0102363	4.5e-06
Sparrow:Crop Fields-Bulbul:Crop Fields	-0.0241765	-0.0345935	-0.0137595	0
Tailorbird:Crop Fields-Bulbul:Crop Fields	-0.0197827	-0.0297044	-0.00986099	0
White-eye:Crop Fields-Bulbul:Crop Fields	-0.00242364	-0.018536	0.0136887	1
Bulbul:Park-Bulbul:Crop Fields	-0.00249318	-0.0109851	0.00599876	0.99998
Flowerpecker:Park-Bulbul:Crop Fields	-0.0117136	-0.0218287	-0.00159858	0.0064214
Prinia:Park-Bulbul:Crop Fields	-0.0249565	-0.0436718	-0.00624117	0.0004152
Robin:Park-Bulbul:Crop Fields	-0.0241036	-0.0365069	-0.0117004	0
Sparrow:Park-Bulbul:Crop Fields	-0.024327	-0.0352167	-0.0134373	0
Tailorbird:Park-Bulbul:Crop Fields	-0.0167963	-0.0262173	-0.00737537	1e-07
White-eye:Park-Bulbul:Crop Fields	-0.00280576	-0.0108513	0.00523982	0.999704
Bulbul:Street-Bulbul:Crop Fields	-0.00331976	-0.012872	0.00623247	0.999719
Flowerpecker:Street-Bulbul:Crop Fields	-0.00921364	-0.0260395	0.00761225	0.928872
Prinia:Street-Bulbul:Crop Fields	-0.0250046	-0.0405086	-0.00950045	2.3e-06
Robin:Street-Bulbul:Crop Fields	-0.0247803	-0.044796	-0.00476461	0.0019466
Sparrow:Street-Bulbul:Crop Fields	-0.0290954	-0.0445995	-0.0135914	0
Tailorbird:Street-Bulbul:Crop Fields	-0.0156919	-0.0253904	-0.00599342	2.1e-06
White-eye:Street-Bulbul:Crop Fields	0.000835826	-0.00757968	0.00925133	1
Prinia:Crop Fields-Flowerpecker:Crop Fields	-0.0140394	-0.0296171	0.00153835	0.142322
Robin:Crop Fields-Flowerpecker:Crop Fields	-0.0179727	-0.0393436	0.00339819	0.243094
Sparrow:Crop Fields-Flowerpecker:Crop Fields	-0.0142356	-0.0301334	0.00166219	0.150384
Tailorbird:Crop Fields-Flowerpecker:Crop Fields	-0.00984178	-0.0254195	0.00573597	0.781119
White-eye:Crop Fields-Flowerpecker:Crop Fields	0.00751727	-0.0125783	0.0276129	0.999186
Bulbul:Park-Flowerpecker:Crop Fields	0.00744773	-0.00726075	0.0221562	0.966554
Flowerpecker:Park-Flowerpecker:Crop Fields	-0.00177273	-0.0174743	0.0139289	1
Prinia:Park-Flowerpecker:Crop Fields	-0.0150156	-0.0372527	0.00722154	0.671432
Robin:Park-Flowerpecker:Crop Fields	-0.0141627	-0.0314274	0.0031019	0.286445
Sparrow:Park-Flowerpecker:Crop Fields	-0.0143861	-0.0305975	0.00182542	0.162127
Tailorbird:Park-Flowerpecker:Crop Fields	-0.00685542	-0.0221191	0.00840829	0.991164
White-eye:Park-Flowerpecker:Crop Fields	0.00713515	-0.00732022	0.0215905	0.974368
Bulbul:Street-Flowerpecker:Crop Fields	0.00662115	-0.00872392	0.0219662	0.994579
Flowerpecker:Street-Flowerpecker:Crop Fields	0.000727273	-0.0199449	0.0213994	1
Prinia:Street-Flowerpecker:Crop Fields	-0.0150636	-0.0346749	0.00454766	0.413979
Robin:Street-Flowerpecker:Crop Fields	-0.0148394	-0.0381815	0.00850272	0.771906
Sparrow:Street-Flowerpecker:Crop Fields	-0.0191545	-0.0387658	0.000456753	0.0651346
Tailorbird:Street-Flowerpecker:Crop Fields	-0.00575099	-0.0211875	0.00968555	0.999232
White-eye:Street-Flowerpecker:Crop Fields	0.0107767	-0.00388774	0.0254412	0.504867
Robin:Crop Fields-Prinia:Crop Fields	-0.00393333	-0.0216754	0.0138087	1
Sparrow:Crop Fields-Prinia:Crop Fields	-0.000196191	-0.0107225	0.0103301	1
Tailorbird:Crop Fields-Prinia:Crop Fields	0.00419762	-0.00583878	0.014234	0.996344
White-eye:Crop Fields-Prinia:Crop Fields	0.0215567	0.00537345	0.0377399	0.0004254
Bulbul:Park-Prinia:Crop Fields	0.0214871	0.0128614	0.0301128	0
Flowerpecker:Park-Prinia:Crop Fields	0.0122667	0.00203908	0.0224943	0.0035081
Prinia:Park-Prinia:Crop Fields	-0.00097619	-0.0197526	0.0178002	1
Robin:Park-Prinia:Crop Fields	-0.000123333	-0.0126186	0.0123719	1
Sparrow:Park-Prinia:Crop Fields	-0.000346667	-0.011341	0.0106477	1
Tailorbird:Park-Prinia:Crop Fields	0.00718397	-0.00235772	0.0167257	0.454941
White-eye:Park-Prinia:Crop Fields	0.0211745	0.0129879	0.0293612	0
Bulbul:Street-Prinia:Crop Fields	0.0206605	0.0109892	0.0303319	0
Flowerpecker:Street-Prinia:Crop Fields	0.0147667	-0.00212712	0.0316604	0.18302
Prinia:Street-Prinia:Crop Fields	-0.00102424	-0.016602	0.0145535	1
Robin:Street-Prinia:Crop Fields	-0.0008	-0.0208728	0.0192728	1
Sparrow:Street-Prinia:Crop Fields	-0.00511515	-0.0206929	0.0104626	0.99988
Tailorbird:Street-Prinia:Crop Fields	0.00828841	-0.00152739	0.0181042	0.236377
White-eye:Street-Prinia:Crop Fields	0.0248161	0.0162657	0.0333666	0
Sparrow:Crop Fields-Robin:Crop Fields	0.00373714	-0.0142865	0.0217608	1
Tailorbird:Crop Fields-Robin:Crop Fields	0.00813095	-0.00961107	0.025873	0.98879
White-eye:Crop Fields-Robin:Crop Fields	0.02549	0.00367381	0.0473062	0.0055323
Bulbul:Park-Robin:Crop Fields	0.0254205	0.00843657	0.0424043	2.23e-05
Flowerpecker:Park-Robin:Crop Fields	0.0162	-0.00165087	0.0340509	0.13398
Prinia:Park-Robin:Crop Fields	0.00295714	-0.0208463	0.0267606	1
Robin:Park-Robin:Crop Fields	0.00381	-0.0154301	0.0230501	1
Sparrow:Park-Robin:Crop Fields	0.00358667	-0.0147143	0.0218876	1
Tailorbird:Park-Robin:Crop Fields	0.0111173	-0.00634963	0.0285842	0.770154
White-eye:Park-Robin:Crop Fields	0.0251079	0.00834271	0.041873	2.2e-05
Bulbul:Street-Robin:Crop Fields	0.0245939	0.0070558	0.042132	0.0001262
Flowerpecker:Street-Robin:Crop Fields	0.0187	-0.00364837	0.0410484	0.25163
Prinia:Street-Robin:Crop Fields	0.00290909	-0.0184618	0.02428	1
Robin:Street-Robin:Crop Fields	0.00313333	-0.0217055	0.0279722	1
Sparrow:Street-Robin:Crop Fields	-0.00118182	-0.0225527	0.0201891	1
Tailorbird:Street-Robin:Crop Fields	0.0122217	-0.00539643	0.0298399	0.620757
White-eye:Street-Robin:Crop Fields	0.0287495	0.0118037	0.0456953	4e-07
Tailorbird:Crop Fields-Sparrow:Crop Fields	0.00439381	-0.00613246	0.0149201	0.996435
White-eye:Crop Fields-Sparrow:Crop Fields	0.0217529	0.00526137	0.0382443	0.0005289
Bulbul:Park-Sparrow:Crop Fields	0.0216833	0.0124923	0.0308744	0
Flowerpecker:Park-Sparrow:Crop Fields	0.0124629	0.00175415	0.0231716	0.0059114
Prinia:Park-Sparrow:Crop Fields	-0.00078	-0.0198227	0.0182627	1
Robin:Park-Sparrow:Crop Fields	7.28571e-05	-0.0128191	0.0129648	1
Sparrow:Park-Sparrow:Crop Fields	-0.000150476	-0.0115937	0.0112928	1
Tailorbird:Park-Sparrow:Crop Fields	0.00738017	-0.00267552	0.0174358	0.50755
White-eye:Park-Sparrow:Crop Fields	0.0213707	0.0125904	0.030151	0
Bulbul:Street-Sparrow:Crop Fields	0.0208567	0.010678	0.0310355	0
Flowerpecker:Street-Sparrow:Crop Fields	0.0149629	-0.00222647	0.0321522	0.189015
Prinia:Street-Sparrow:Crop Fields	-0.000828052	-0.0167258	0.0150697	1
Robin:Street-Sparrow:Crop Fields	-0.00060381	-0.020926	0.0197184	1
Sparrow:Street-Sparrow:Crop Fields	-0.00491896	-0.0208167	0.0109788	0.999953
Tailorbird:Street-Sparrow:Crop Fields	0.0084846	-0.00183154	0.0188007	0.281781
White-eye:Street-Sparrow:Crop Fields	0.0250123	0.0158919	0.0341328	0
White-eye:Crop Fields-Tailorbird:Crop Fields	0.0173591	0.00117584	0.0335423	0.0205335
Bulbul:Park-Tailorbird:Crop Fields	0.0172895	0.00866382	0.0259152	0
Flowerpecker:Park-Tailorbird:Crop Fields	0.00806905	-0.00215854	0.0182966	0.360322
Prinia:Park-Tailorbird:Crop Fields	-0.00517381	-0.0239502	0.0136026	0.999993
Robin:Park-Tailorbird:Crop Fields	-0.00432095	-0.0168162	0.00817427	0.999739
Sparrow:Park-Tailorbird:Crop Fields	-0.00454429	-0.0155386	0.00645004	0.99686
Tailorbird:Park-Tailorbird:Crop Fields	0.00298635	-0.00655533	0.012528	0.999943
White-eye:Park-Tailorbird:Crop Fields	0.0169769	0.0087903	0.0251635	0
Bulbul:Street-Tailorbird:Crop Fields	0.0164629	0.00679161	0.0261342	4e-07
Flowerpecker:Street-Tailorbird:Crop Fields	0.010569	-0.00632473	0.0274628	0.79514
Prinia:Street-Tailorbird:Crop Fields	-0.00522186	-0.0207996	0.0103559	0.999836
Robin:Street-Tailorbird:Crop Fields	-0.00499762	-0.0250704	0.0150752	0.999999
Sparrow:Street-Tailorbird:Crop Fields	-0.00931277	-0.0248905	0.00626498	0.8524
Tailorbird:Street-Tailorbird:Crop Fields	0.00409079	-0.00572501	0.0139066	0.996507
White-eye:Street-Tailorbird:Crop Fields	0.0206185	0.0120681	0.0291689	0
Bulbul:Park-White-eye:Crop Fields	-6.95455e-05	-0.0154178	0.0152787	1
Flowerpecker:Park-White-eye:Crop Fields	-0.00929	-0.0255925	0.00701247	0.89936
Prinia:Park-White-eye:Crop Fields	-0.0225329	-0.0451982	0.00013253	0.0534847
Robin:Park-White-eye:Crop Fields	-0.02168	-0.0394928	-0.00386715	0.0026854
Sparrow:Park-White-eye:Crop Fields	-0.0219033	-0.0386974	-0.00510922	0.0006757
Tailorbird:Park-White-eye:Crop Fields	-0.0143727	-0.0302538	0.00150845	0.137263
White-eye:Park-White-eye:Crop Fields	-0.000382126	-0.015488	0.0147238	1
Bulbul:Street-White-eye:Crop Fields	-0.000896122	-0.0168555	0.0150632	1
Flowerpecker:Street-White-eye:Crop Fields	-0.00679	-0.0279221	0.0143421	0.999914
Prinia:Street-White-eye:Crop Fields	-0.0225809	-0.0426765	-0.00248531	0.0104011
Robin:Street-White-eye:Crop Fields	-0.0223567	-0.0461071	0.0013938	0.0953699
Sparrow:Street-White-eye:Crop Fields	-0.0266718	-0.0467674	-0.00657622	0.0004611
Tailorbird:Street-White-eye:Crop Fields	-0.0132683	-0.0293156	0.00277907	0.272355
White-eye:Street-White-eye:Crop Fields	0.00325946	-0.0120466	0.0185656	1
Flowerpecker:Park-Bulbul:Park	-0.00922046	-0.0180679	-0.000373049	0.0301809
Prinia:Park-Bulbul:Park	-0.0224633	-0.040525	-0.00440159	0.0017827
Robin:Park-Bulbul:Park	-0.0216104	-0.0330036	-0.0102173	0
Sparrow:Park-Bulbul:Park	-0.0218338	-0.0315574	-0.0121102	0
Tailorbird:Park-Bulbul:Park	-0.0143032	-0.0223478	-0.00625847	1e-07
White-eye:Park-Bulbul:Park	-0.00031258	-0.00669174	0.00606658	1
Bulbul:Street-Bulbul:Park	-0.000826577	-0.00902459	0.00737144	1
Flowerpecker:Street-Bulbul:Park	-0.00672046	-0.0228162	0.00937529	0.996423
Prinia:Street-Bulbul:Park	-0.0225114	-0.0372198	-0.00780289	1.17e-05
Robin:Street-Bulbul:Park	-0.0222871	-0.0416931	-0.00288118	0.0073584
Sparrow:Street-Bulbul:Park	-0.0266023	-0.0413107	-0.0118938	0
Tailorbird:Street-Bulbul:Park	-0.0131987	-0.0215667	-0.00483075	4.7e-06
White-eye:Street-Bulbul:Park	0.00332901	-0.0035108	0.0101688	0.977951
Prinia:Park-Flowerpecker:Park	-0.0132429	-0.0321221	0.00563642	0.599081
Robin:Park-Flowerpecker:Park	-0.01239	-0.0250393	0.000259297	0.0631378
Sparrow:Park-Flowerpecker:Park	-0.0126133	-0.0237825	-0.0014442	0.0096236
Tailorbird:Park-Flowerpecker:Park	-0.00508269	-0.0148253	0.0046599	0.954904
White-eye:Park-Flowerpecker:Park	0.00890787	0.000487961	0.0173278	0.0247751
Bulbul:Street-Flowerpecker:Park	0.00839388	-0.0014757	0.0182635	0.224678
Flowerpecker:Street-Flowerpecker:Park	0.0025	-0.0145081	0.0195081	1
Prinia:Street-Flowerpecker:Park	-0.0132909	-0.0289925	0.0024107	0.232346
Robin:Street-Flowerpecker:Park	-0.0130667	-0.0332357	0.00710241	0.742587
Sparrow:Street-Flowerpecker:Park	-0.0173818	-0.0330834	-0.00168021	0.0130513
Tailorbird:Street-Flowerpecker:Park	-0.00397826	-0.0139895	0.00603293	0.998132
White-eye:Street-Flowerpecker:Park	0.0125495	0.0037754	0.0213235	7.64e-05
Robin:Park-Prinia:Park	0.000852857	-0.019345	0.0210507	1
Sparrow:Park-Prinia:Park	0.000629524	-0.0186759	0.0199349	1
Tailorbird:Park-Prinia:Park	0.00816017	-0.0103565	0.0266768	0.992969
White-eye:Park-Prinia:Park	0.0221507	0.00429452	0.0400069	0.0018735
Bulbul:Street-Prinia:Park	0.0216367	0.00305293	0.0402205	0.0058713
Flowerpecker:Street-Prinia:Park	0.0157429	-0.00743522	0.0389209	0.660687
Prinia:Street-Prinia:Park	-4.8052e-05	-0.0222852	0.0221891	1
Robin:Street-Prinia:Park	0.000176191	-0.0254117	0.0257641	1
Sparrow:Street-Prinia:Park	-0.00413896	-0.0263761	0.0180982	1
Tailorbird:Street-Prinia:Park	0.0092646	-0.0093948	0.027924	0.972723
White-eye:Street-Prinia:Park	0.0257923	0.00776641	0.0438182	7.57e-05
Sparrow:Park-Robin:Park	-0.000223333	-0.0135002	0.0130536	1
Tailorbird:Park-Robin:Park	0.00730731	-0.00479414	0.0194088	0.840878
White-eye:Park-Robin:Park	0.0212979	0.0102334	0.0323623	0
Bulbul:Street-Robin:Park	0.0207839	0.00857996	0.0329878	3e-07
Flowerpecker:Street-Robin:Park	0.01489	-0.0035708	0.0333508	0.317704
Prinia:Street-Robin:Park	-0.000900909	-0.0181655	0.0163637	1
Robin:Street-Robin:Park	-0.000676667	-0.022085	0.0207317	1
Sparrow:Street-Robin:Park	-0.00499182	-0.0222564	0.0122728	0.999984
Tailorbird:Street-Robin:Park	0.00841174	-0.00390699	0.0207305	0.650778
White-eye:Street-Robin:Park	0.0249395	0.0136032	0.0362757	0
Tailorbird:Park-Sparrow:Park	0.00753064	-0.00301401	0.0180753	0.563247
White-eye:Park-Sparrow:Park	0.0215212	0.0121849	0.0308575	0
Bulbul:Street-Sparrow:Park	0.0210072	0.0103451	0.0316693	0
Flowerpecker:Street-Sparrow:Park	0.0151133	-0.00236653	0.0325932	0.199026
Prinia:Street-Sparrow:Park	-0.000677576	-0.0168891	0.0155339	1
Robin:Street-Sparrow:Park	-0.000453333	-0.0210218	0.0201152	1
Sparrow:Street-Sparrow:Park	-0.00476849	-0.02098	0.011443	0.999979
Tailorbird:Street-Sparrow:Park	0.00863507	-0.00215825	0.0194284	0.333183
White-eye:Street-Sparrow:Park	0.0251628	0.0155059	0.0348197	0
White-eye:Park-Tailorbird:Park	0.0139906	0.00641857	0.0215626	0
Bulbul:Street-Tailorbird:Park	0.0134766	0.00431967	0.0226335	3.57e-05
Flowerpecker:Street-Tailorbird:Park	0.00758269	-0.00902196	0.0241873	0.989246
Prinia:Street-Tailorbird:Park	-0.00820822	-0.0234719	0.00705549	0.939756
Robin:Street-Tailorbird:Park	-0.00798397	-0.0278141	0.0118461	0.997775
Sparrow:Street-Tailorbird:Park	-0.0122991	-0.0275628	0.00296458	0.319573
Tailorbird:Street-Tailorbird:Park	0.00110443	-0.00820494	0.0104138	1
White-eye:Street-Tailorbird:Park	0.0176321	0.0096682	0.0255961	0
Bulbul:Street-White-eye:Park	-0.000513997	-0.00824871	0.00722072	1
Flowerpecker:Street-White-eye:Park	-0.00640787	-0.0222727	0.00945691	0.997679
Prinia:Street-White-eye:Park	-0.0221988	-0.0366541	-0.00774342	1.06e-05
Robin:Street-White-eye:Park	-0.0219745	-0.0411893	-0.00275973	0.0078792
Sparrow:Street-White-eye:Park	-0.0262897	-0.0407451	-0.0118343	0
Tailorbird:Street-White-eye:Park	-0.0128861	-0.0208008	-0.00497152	1.7e-06
White-eye:Street-White-eye:Park	0.00364159	-0.00263546	0.00991864	0.88337
Flowerpecker:Street-Bulbul:Street	-0.00589388	-0.0225734	0.0107856	0.999641
Prinia:Street-Bulbul:Street	-0.0216848	-0.0370299	-0.00633971	0.0001041
Robin:Street-Bulbul:Street	-0.0214605	-0.0413533	-0.00156777	0.0189606
Sparrow:Street-Bulbul:Street	-0.0257757	-0.0411208	-0.0104306	6e-07
Tailorbird:Street-Bulbul:Street	-0.0123721	-0.0218143	-0.00292995	0.0006113
White-eye:Street-Bulbul:Street	0.00415558	-0.00396322	0.0122744	0.962682
Prinia:Street-Flowerpecker:Street	-0.0157909	-0.036463	0.00488121	0.425255
Robin:Street-Flowerpecker:Street	-0.0155667	-0.0398069	0.00867355	0.756498
Sparrow:Street-Flowerpecker:Street	-0.0198818	-0.0405539	0.000790306	0.0767447
Tailorbird:Street-Flowerpecker:Street	-0.00647826	-0.0232419	0.0102854	0.998721
White-eye:Street-Flowerpecker:Street	0.0100495	-0.00600608	0.026105	0.794467
Robin:Street-Prinia:Street	0.000224242	-0.0231179	0.0235664	1
Sparrow:Street-Prinia:Street	-0.00409091	-0.0237022	0.0155204	1
Tailorbird:Street-Prinia:Street	0.00931265	-0.00612389	0.0247492	0.841955
White-eye:Street-Prinia:Street	0.0258404	0.0111759	0.0405048	1e-07
Sparrow:Street-Robin:Street	-0.00431515	-0.0276573	0.019027	1
Tailorbird:Street-Robin:Street	0.00908841	-0.010875	0.0290518	0.989629
White-eye:Street-Robin:Street	0.0256161	0.00624352	0.0449887	0.000501
Tailorbird:Street-Sparrow:Street	0.0134036	-0.00203298	0.0288401	0.192685
White-eye:Street-Sparrow:Street	0.0299313	0.0152668	0.0445958	0
White-eye:Street-Tailorbird:Street	0.0165277	0.00823734	0.0248181	0
